# Supplementary material
Source: PubMed Central journal article supplement (PMC3701020)
Supplement: NIHMS464733-supplement-eTable.pdf [file NIHMS464733-supplement-eTable.pdf]

## Supplementary Online Content

Frans EM, Sandin S, Reichenberg A, et al. Autism risk across generations: a population-based study of advancing grandparental and paternal age. Published online March 20, 2013. *JAMA Psychiatry*. doi:10.1001/jamapsychiatry.2013.1180.

### **eTable. Results from logistic regression analyses on grandparental ages and autism risk only including inpatients**

This supplementary material has been provided by the authors to give readers additional information about their work.

**eTable. Results From Logistic Regression Analyses on Grandparental Ages and Autism Risk Only Including Inpatients**

| SNP        | Chromosome | Position    | Gene           | Location        | Coding Status | Amino Acid Change | Major Allele | Minor Allele | MAF    | HWE $\chi^2$ Exact Test P Value |
|------------|------------|-------------|----------------|-----------------|---------------|-------------------|--------------|--------------|--------|---------------------------------|
| rs7539745  | 1          | 152,793,038 | <i>CHRNA2</i>  | Intron          | -1            | -1                | G            | C            | 0.141  | 0.239                           |
| rs7543174  | 1          | 152,794,296 | <i>CHRNA2</i>  | Intron          | -1            | -1                | T            | C            | 0.157  | 0.422                           |
| rs4845652  | 1          | 152,804,829 | <i>CHRNA2</i>  | Flanking 5' UTR | -1            | -1                | C            | T            | 0.0883 | 0.661                           |
| rs2072658  | 1          | 152,806,849 | <i>CHRNA2</i>  | Flanking 5' UTR | -1            | -1                | G            | A            | 0.0163 | 1                               |
| rs2072659  | 1          | 152,815,145 | <i>CHRNA2</i>  | 3' UTR          | -1            | -1                | C            | G            | 0.104  | 0.845                           |
| rs2072660  | 1          | 152,815,345 | <i>CHRNA2</i>  | 3' UTR          | -1            | -1                | C            | T            | 0.235  | 0.0291                          |
| rs2072661  | 1          | 152,815,504 | <i>CHRNA2</i>  | 3' UTR          | -1            | -1                | G            | A            | 0.236  | 0.0304                          |
| rs3811450  | 1          | 152,817,656 | <i>CHRNA2</i>  | Flanking 3' UTR | -1            | -1                | C            | T            | 0.0716 | 0.42                            |
| rs9616     | 1          | 152,822,357 | <i>CHRNA2</i>  | 3' UTR          | -1            | -1                | A            | T            | 0.283  | 0.728                           |
| rs1127314  | 1          | 152,822,890 | <i>CHRNA2</i>  | 3' UTR          | -1            | -1                | A            | G            | 0.298  | 0.128                           |
| rs1127313  | 1          | 152,823,049 | <i>CHRNA2</i>  | 3' UTR          | -1            | -1                | G            | A            | 0.468  | 0.435                           |
| rs2131902  | 1          | 152,826,222 | <i>CHRNA2</i>  | Intron          | -1            | -1                | T            | C            | 0.308  | 0.158                           |
| rs3766927  | 1          | 152,830,765 | <i>CHRNA2</i>  | Flanking 5' UTR | -1            | -1                | C            | T            | 0.298  | 0.128                           |
| rs12244716 | 10         | 134,978,372 | <i>CALCYON</i> | Flanking 3' UTR | -1            | -1                | G            | C            | 0.129  | 0.754                           |
| rs2275723  | 10         | 134,989,625 | <i>CALCYON</i> | Intron          | -1            | -1                | G            | A            | 0.0954 | 0.836                           |
| rs10776672 | 10         | 135,007,945 | <i>CALCYON</i> | Flanking 5' UTR | -1            | -1                | A            | G            | 0.105  | 0.449                           |
| rs4838721  | 10         | 135,010,940 | <i>CALCYON</i> | Intron          | -1            | -1                | T            | C            | 0.178  | 0.903                           |
| rs7932167  | 11         | 610,599     | <i>DRD4</i>    | Intron          | -1            | -1                | T            | G            | 0.22   | 0.355                           |
| rs12280580 | 11         | 616,220     | <i>DRD4</i>    | Flanking 3' UTR | -1            | -1                | C            | G            | 0.288  | 0.142                           |
| rs4987059  | 11         | 626,433     | <i>DRD4</i>    | Flanking 5' UTR | -1            | -1                | G            | A            | 0.0565 | 0.506                           |
| rs936461   | 11         | 626,496     | <i>DRD4</i>    | Flanking 5' UTR | -1            | -1                | G            | A            | 0.358  | 0.479                           |
| rs10902188 | 11         | 644,043     | <i>DRD4</i>    | Coding          | -1            | -1                | G            | A            | 0.0877 | 0.263                           |
| rs6598007  | 11         | 646,523     | <i>DRD4</i>    | Intron          | -1            | -1                | C            | T            | 0.0595 | 0.105                           |
| rs4963126  | 11         | 646,845     | <i>DRD4</i>    | Intron          | -1            | -1                | G            | A            | 0.469  | 1                               |
| rs11603404 | 11         | 646,940     | <i>DRD4</i>    | Intron          | -1            | -1                | G            | A            | 0.135  | 0.223                           |
| rs11214589 | 11         | 112,750,258 | <i>ANKK1</i>   | Flanking 3' UTR | -1            | -1                | G            | A            | 0.485  | 0.0811                          |
| rs4938010  | 11         | 112,750,776 | <i>ANKK1</i>   | Flanking 3' UTR | -1            | -1                | A            | G            | 0.143  | 0.665                           |
| rs754672   | 11         | 112,754,346 | <i>ANKK1</i>   | Flanking 3' UTR | -1            | -1                | T            | C            | 0.474  | 0.722                           |
| rs3897584  | 11         | 112,754,935 | <i>ANKK1</i>   | Flanking 3' UTR | -1            | -1                | C            | G            | 0.336  | 0.204                           |
| rs10891545 | 11         | 112,763,275 | <i>ANKK1</i>   | Flanking 5' UTR | -1            | -1                | T            | C            | 0.14   | 1                               |
| rs4938012  | 11         | 112,764,864 | <i>ANKK1</i>   | Intron          | -1            | -1                | G            | A            | 0.33   | 0.336                           |
| rs7123797  | 11         | 112,767,781 | <i>ANKK1</i>   | Intron          | -1            | -1                | G            | A            | 0.336  | 0.0566                          |
| rs12360992 | 11         | 112,768,110 | <i>ANKK1</i>   | Intron          | -1            | -1                | C            | A            | 0.469  | 0.776                           |
| rs4590907  | 11         | 112,768,580 | <i>ANKK1</i>   | Intron          | -1            | -1                | T            | G            | 0.137  | 0.881                           |

© 2013 American Medical Association. All rights reserved.

|            |    |             |               |                 |        |                   |   |   |          |       |
|------------|----|-------------|---------------|-----------------|--------|-------------------|---|---|----------|-------|
| rs17115439 | 11 | 112,769,482 | <i>ANKK1</i>  | Coding          | -1     | -1                | C | T | 0.333    | 0.426 |
| rs11214596 | 11 | 112,769,721 | <i>ANKK1</i>  | Intron          | -1     | -1                | G | C | 0.469    | 0.831 |
| rs4938015  | 11 | 112,769,854 | <i>ANKK1</i>  | Intron          | -1     | -1                | C | T | 0.332    | 0.426 |
| rs7118900  | 11 | 112,772,031 | <i>ANKK1</i>  | Coding          | NONSYN | A239T (NP_848605) | G | A | 0.198    | 0.738 |
| rs4938016  | 11 | 112,775,225 | <i>ANKK1</i>  | Coding          | NONSYN | G442R (NP_848605) | C | G | 0.304    | 0.867 |
| rs2734849  | 11 | 112,775,370 | <i>ANKK1</i>  | Coding          | NONSYN | H490R (NP_848605) | G | A | 0.5      | 1     |
| rs2734848  | 11 | 112,775,584 | <i>ANKK1</i>  | Coding          | SYNON  | Y561Y (NP_848605) | T | C | 0.16     | 0.893 |
| rs7104979  | 11 | 112,775,688 | <i>ANKK1</i>  | Coding          | NONSYN | P596L (NP_848605) | C | T | 6.30E-04 | 1     |
| rs11214601 | 11 | 112,777,972 | <i>ANKK1</i>  | Flanking 3' UTR | -1     | -1                | C | T | 0.169    | 0.707 |
| rs1003641  | 11 | 112,778,846 | <i>ANKK1</i>  | Flanking 3' UTR | -1     | -1                | G | A | 0.29     | 0.931 |
| rs12422191 | 11 | 112,779,220 | <i>ANKK1</i>  | Flanking 3' UTR | -1     | -1                | G | A | 0.0816   | 0.811 |
| rs10891549 | 11 | 112,783,657 | <i>ANKK1</i>  | Flanking 3' UTR | -1     | -1                | C | T | 0.461    | 0.83  |
| rs2734841  | 11 | 112,786,986 | <i>ANKK1</i>  | Intron          | -1     | -1                | C | A | 0.29     | 0.797 |
| rs1124491  | 11 | 112,787,300 | <i>ANKK1</i>  | Intron          | -1     | -1                | G | A | 0.169    | 0.707 |
| rs1124492  | 11 | 112,787,485 | <i>ANKK1</i>  | Intron          | -1     | -1                | C | A | 0.114    | 0.598 |
| rs6277     | 11 | 112,788,669 | <i>ANKK1</i>  | Coding          | SYNON  | P290P (NP_057658) | A | G | 0.461    | 1     |
| rs1076560  | 11 | 112,788,898 | <i>ANKK1</i>  | Intron          | -1     | -1                | C | A | 0.17     | 0.707 |
| rs2440390  | 11 | 112,792,088 | <i>DRD2</i>   | Intron          | -1     | -1                | C | T | 0.122    | 0.741 |
| rs1079727  | 11 | 112,794,392 | <i>DRD2</i>   | Intron          | -1     | -1                | T | C | 0.167    | 0.371 |
| rs2734833  | 11 | 112,798,130 | <i>DRD2</i>   | Intron          | -1     | -1                | A | G | 0.399    | 0.823 |
| rs1076562  | 11 | 112,801,218 | <i>DRD2</i>   | Intron          | -1     | -1                | G | A | 0.236    | 0.624 |
| rs2471851  | 11 | 112,806,279 | <i>DRD2</i>   | Intron          | -1     | -1                | A | C | 0.167    | 0.523 |
| rs7122246  | 11 | 112,809,667 | <i>DRD2</i>   | Intron          | -1     | -1                | A | G | 0.404    | 0.768 |
| rs4436578  | 11 | 112,811,975 | <i>DRD2</i>   | Intron          | -1     | -1                | T | C | 0.123    | 0.101 |
| rs4587762  | 11 | 112,812,103 | <i>DRD2</i>   | Intron          | -1     | -1                | A | G | 0.408    | 0.769 |
| rs4586205  | 11 | 112,812,339 | <i>DRD2</i>   | Intron          | -1     | -1                | T | G | 0.243    | 0.7   |
| rs4620755  | 11 | 112,814,829 | <i>DRD2</i>   | Intron          | -1     | -1                | G | A | 0.119    | 0.124 |
| rs7125415  | 11 | 112,815,891 | <i>DRD2</i>   | Intron          | -1     | -1                | C | T | 0.0946   | 0.409 |
| rs4936270  | 11 | 112,823,618 | <i>DRD2</i>   | Intron          | -1     | -1                | C | T | 0.0999   | 0.234 |
| rs4274224  | 11 | 112,824,662 | <i>DRD2</i>   | Intron          | -1     | -1                | A | G | 0.466    | 0.831 |
| rs4245148  | 11 | 112,825,629 | <i>DRD2</i>   | Intron          | -1     | -1                | C | T | 0.101    | 0.243 |
| rs4460839  | 11 | 112,827,006 | <i>DRD2</i>   | Intron          | -1     | -1                | T | C | 0.0955   | 0.146 |
| rs7122454  | 11 | 112,832,678 | <i>DRD2</i>   | Intron          | -1     | -1                | G | C | 0.148    | 0.675 |
| rs7131056  | 11 | 112,834,984 | <i>DRD2</i>   | Intron          | -1     | -1                | C | A | 0.434    | 0.885 |
| rs11214611 | 11 | 112,835,429 | <i>DRD2</i>   | Intron          | -1     | -1                | A | G | 0.149    | 0.677 |
| rs10891552 | 11 | 112,838,881 | <i>DRD2</i>   | Intron          | -1     | -1                | A | T | 0.0388   | 0.626 |
| rs4630328  | 11 | 112,839,419 | <i>DRD2</i>   | Intron          | -1     | -1                | G | A | 0.363    | 0.647 |
| rs11214613 | 11 | 112,840,469 | <i>DRD2</i>   | Intron          | -1     | -1                | G | A | 0.0903   | 0.278 |
| rs4938019  | 11 | 112,846,601 | <i>DRD2</i>   | Intron          | -1     | -1                | T | C | 0.152    | 0.891 |
| rs1799978  | 11 | 112,851,561 | <i>DRD2</i>   | Flanking 5' UTR | -1     | -1                | T | C | 0.0533   | 1     |
| rs10891556 | 11 | 112,857,971 | <i>DRD2</i>   | Flanking 5' UTR | -1     | -1                | G | T | 0.174    | 1     |
| rs6589377  | 11 | 112,860,946 | <i>DRD2</i>   | Flanking 5' UTR | -1     | -1                | A | G | 0.364    | 0.703 |
| rs1514246  | 15 | 30,106,782  | <i>CHRNA7</i> | Flanking 5' UTR | -1     | -1                | C | A | 0.256    | 0.352 |

© 2013 American Medical Association. All rights reserved.

|            |    |            |               |                 |    |    |   |   |        |        |
|------------|----|------------|---------------|-----------------|----|----|---|---|--------|--------|
| rs868437   | 15 | 30,111,569 | CHRNA7        | Intron          | -1 | -1 | T | C | 0.275  | 0.479  |
| rs883473   | 15 | 30,112,968 | CHRNA7        | Intron          | -1 | -1 | G | A | 0.289  | 0.545  |
| rs4779563  | 15 | 30,124,529 | CHRNA7        | Intron          | -1 | -1 | C | T | 0.232  | 1      |
| rs1913456  | 15 | 30,133,241 | CHRNA7        | Intron          | -1 | -1 | A | T | 0.185  | 0.557  |
| rs4779969  | 15 | 30,136,223 | CHRNA7        | Intron          | -1 | -1 | C | A | 0.0477 | 0.416  |
| rs8027814  | 15 | 30,137,964 | CHRNA7        | Intron          | -1 | -1 | A | G | 0.274  | 0.421  |
| rs2175886  | 15 | 30,143,239 | CHRNA7        | Intron          | -1 | -1 | T | C | 0.448  | 0.0441 |
| rs11071530 | 15 | 30,147,264 | CHRNA7        | Intron          | -1 | -1 | G | A | 0.0899 | 0.127  |
| rs6494211  | 15 | 30,164,880 | CHRNA7        | Intron          | -1 | -1 | A | T | 0.326  | 0.0519 |
| rs8033518  | 15 | 30,168,901 | CHRNA7        | Intron          | -1 | -1 | G | A | 0.0471 | 0.25   |
| rs2133965  | 15 | 30,171,846 | CHRNA7        | Intron          | -1 | -1 | G | A | 0.0628 | 0.229  |
| rs7175581  | 15 | 30,172,759 | CHRNA7        | Intron          | -1 | -1 | G | A | 0.418  | 0.512  |
| rs4779565  | 15 | 30,177,362 | CHRNA7        | Intron          | -1 | -1 | G | T | 0.421  | 0.513  |
| rs8035668  | 15 | 30,178,638 | CHRNA7        | Intron          | -1 | -1 | A | G | 0.203  | 0.827  |
| rs9788657  | 15 | 30,182,318 | CHRNA7        | Intron          | -1 | -1 | C | A | 0.202  | 0.741  |
| rs6494223  | 15 | 30,183,749 | CHRNA7        | Intron          | -1 | -1 | C | T | 0.38   | 0.822  |
| rs8030315  | 15 | 30,184,411 | CHRNA7        | Intron          | -1 | -1 | C | T | 0.2    | 0.912  |
| rs9788679  | 15 | 30,186,609 | CHRNA7        | Intron          | -1 | -1 | C | A | 0.194  | 0.571  |
| rs10438342 | 15 | 30,189,338 | CHRNA7        | Intron          | -1 | -1 | G | A | 0.374  | 0.762  |
| rs11852956 | 15 | 30,190,622 | CHRNA7        | Intron          | -1 | -1 | T | C | 0.224  | 0.185  |
| rs1039394  | 15 | 30,195,021 | CHRNA7        | Intron          | -1 | -1 | C | G | 0.0581 | 0.177  |
| rs16956223 | 15 | 30,198,075 | CHRNA7        | Intron          | -1 | -1 | G | A | 0.163  | 0.796  |
| rs1392808  | 15 | 30,198,807 | CHRNA7        | Intron          | -1 | -1 | C | A | 0.16   | 0.598  |
| rs904952   | 15 | 30,206,037 | CHRNA7        | Intron          | -1 | -1 | T | C | 0.485  | 0.776  |
| rs7402321  | 15 | 30,207,700 | CHRNA7        | Intron          | -1 | -1 | C | T | 0.373  | 0.218  |
| rs7175359  | 15 | 30,212,239 | CHRNA7        | Intron          | -1 | -1 | C | T | 0.482  | 0.62   |
| rs2651418  | 15 | 30,226,573 | CHRNA7        | Intron          | -1 | -1 | T | C | 0.498  | 0.355  |
| rs2611605  | 15 | 30,228,925 | CHRNA7        | Intron          | -1 | -1 | C | T | 0.193  | 0.82   |
| rs7178176  | 15 | 30,231,105 | CHRNA7        | Intron          | -1 | -1 | C | T | 0.248  | 0.506  |
| rs2337980  | 15 | 30,231,488 | CHRNA7        | Intron          | -1 | -1 | C | T | 0.443  | 0.35   |
| rs7164518  | 15 | 30,249,900 | CHRNA7        | Flanking 3' UTR | -1 | -1 | A | G | 0.174  | 0.804  |
| rs4275821  | 15 | 76,636,596 | CHRNA5        | Flanking 3' UTR | -1 | -1 | T | C | 0.362  | 0.4    |
| rs2036527  | 15 | 76,638,670 | CHRNA5        | Flanking 5' UTR | -1 | -1 | G | A | 0.407  | 0.66   |
| rs684513   | 15 | 76,645,455 | CHRNA5        | Intron          | -1 | -1 | C | G | 0.162  | 1      |
| rs871058   | 15 | 76,645,546 | CHRNA5        | Intron          | -1 | -1 | G | A | 0.348  | 0.391  |
| rs667282   | 15 | 76,650,527 | CHRNA5        | Intron          | -1 | -1 | T | C | 0.182  | 0.635  |
| rs601079   | 15 | 76,656,634 | CHRNA5        | Intron          | -1 | -1 | A | T | 0.414  | 1      |
| rs637137   | 15 | 76,661,031 | CHRNA5        | Intron          | -1 | -1 | T | A | 0.182  | 0.635  |
| rs692780   | 15 | 76,663,560 | CHRNA5        | Intron          | -1 | -1 | G | C | 0.365  | 0.879  |
| rs555018   | 15 | 76,666,297 | CHRNA3;CHRNA5 | Intron          | -1 | -1 | A | G | 0.412  | 1      |
| rs647041   | 15 | 76,667,536 | CHRNA3;CHRNA5 | Intron          | -1 | -1 | C | T | 0.413  | 0.884  |
| rs514743   | 15 | 76,671,282 | CHRNA3;CHRNA5 | Intron          | -1 | -1 | A | T | 0.369  | 0.82   |
| rs578776   | 15 | 76,675,455 | CHRNA3;CHRNA5 | 3' UTR          | -1 | -1 | G | A | 0.223  | 0.54   |

© 2013 American Medical Association. All rights reserved.

|            |    |            |                      |                 |       |                   |   |   |          |       |
|------------|----|------------|----------------------|-----------------|-------|-------------------|---|---|----------|-------|
| rs6495307  | 15 | 76,677,376 | <i>CHRNA3;CHRNA5</i> | Intron          | -1    | -1                | C | T | 0.415    | 0.942 |
| rs1051730  | 15 | 76,681,394 | <i>CHRNA3;CHRNA5</i> | Coding          | SYNON | Y215Y (NP_000734) | G | A | 0.396    | 0.235 |
| rs3743078  | 15 | 76,681,814 | <i>CHRNA3;CHRNA5</i> | Intron          | -1    | -1                | G | C | 0.185    | 0.64  |
| rs1317286  | 15 | 76,683,184 | <i>CHRNA3;CHRNA5</i> | Intron          | -1    | -1                | A | G | 0.404    | 0.659 |
| rs938682   | 15 | 76,683,602 | <i>CHRNA3</i>        | Intron          | -1    | -1                | A | G | 0.181    | 0.72  |
| rs4887069  | 15 | 76,696,125 | <i>CHRNA3;CHRNA4</i> | Intron          | -1    | -1                | A | G | 0.186    | 0.64  |
| rs3743075  | 15 | 76,696,507 | <i>CHRNA3;CHRNA4</i> | Coding          | SYNON | K97K (NP_000734)  | C | T | 0.366    | 1     |
| rs3743073  | 15 | 76,696,594 | <i>CHRNA3;CHRNA4</i> | Intron          | -1    | -1                | T | G | 0.37     | 0.939 |
| rs1878399  | 15 | 76,699,058 | <i>CHRNA3;CHRNA4</i> | Intron          | -1    | -1                | C | G | 0.418    | 0.827 |
| rs6495309  | 15 | 76,702,300 | <i>CHRNA3;CHRNA4</i> | Flanking 3' UTR | -1    | -1                | C | T | 0.172    | 0.456 |
| rs1948     | 15 | 76,704,454 | <i>CHRNA3;CHRNA4</i> | 3' UTR          | -1    | -1                | G | A | 0.341    | 0.53  |
| rs7178270  | 15 | 76,708,132 | <i>CHRNA3;CHRNA4</i> | Intron          | -1    | -1                | C | G | 0.392    | 0.552 |
| rs950776   | 15 | 76,713,073 | <i>CHRNA4</i>        | Intron          | -1    | -1                | T | C | 0.342    | 0.694 |
| rs12441998 | 15 | 76,716,427 | <i>CHRNA4</i>        | Intron          | -1    | -1                | A | G | 0.177    | 1     |
| rs1316971  | 15 | 76,717,565 | <i>CHRNA4</i>        | Intron          | -1    | -1                | G | A | 0.177    | 1     |
| rs11633223 | 15 | 76,722,531 | <i>CHRNA4</i>        | Flanking 5' UTR | -1    | -1                | T | C | 0.378    | 0.291 |
| rs3971872  | 15 | 76,729,090 | <i>CHRNA4</i>        | Flanking 5' UTR | -1    | -1                | C | T | 0.0902   | 0.828 |
| rs4603829  | 20 | 61,439,336 | <i>CHRNA4</i>        | Flanking 3' UTR | -1    | -1                | T | C | 0.358    | 0.442 |
| rs4809538  | 20 | 61,440,620 | <i>CHRNA4</i>        | Flanking 3' UTR | -1    | -1                | G | A | 0.227    | 1     |
| rs4522666  | 20 | 61,444,924 | <i>CHRNA4</i>        | Flanking 3' UTR | -1    | -1                | A | G | 0.362    | 0.939 |
| rs2236196  | 20 | 61,448,000 | <i>CHRNA4</i>        | Intron          | -1    | -1                | A | G | 0.262    | 0.784 |
| rs3787137  | 20 | 61,449,544 | <i>CHRNA4</i>        | Intron          | -1    | -1                | A | G | 0.414    | 1     |
| rs1044396  | 20 | 61,451,578 | <i>CHRNA4</i>        | Coding          | SYNON | S543S (NP_000735) | A | G | 0.449    | 0.884 |
| rs755203   | 20 | 61,464,708 | <i>CHRNA4</i>        | Flanking 5' UTR | -1    | -1                | A | G | 0.432    | 1     |
| rs4809549  | 20 | 61,472,553 | <i>CHRNA4</i>        | Flanking 5' UTR | -1    | -1                | G | C | 0.476    | 0.67  |
| rs4485648  | 22 | 18,299,405 | <i>COMT</i>          | Intron          | -1    | -1                | T | C | 0.188    | 0.908 |
| rs8140265  | 22 | 18,301,641 | <i>COMT</i>          | Flanking 5' UTR | -1    | -1                | G | A | 0.29     | 0.931 |
| rs8137828  | 22 | 18,303,406 | <i>COMT</i>          | Flanking 3' UTR | -1    | -1                | C | T | 0.468    | 0.831 |
| rs2871047  | 22 | 18,306,331 | <i>COMT</i>          | Flanking 5' UTR | -1    | -1                | G | A | 0.0555   | 0.294 |
| rs6518592  | 22 | 18,307,146 | <i>COMT</i>          | Flanking 5' UTR | -1    | -1                | C | A | 0.427    | 1     |
| rs737865   | 22 | 18,310,121 | <i>COMT</i>          | Intron          | -1    | -1                | A | G | 0.293    | 1     |
| rs1544325  | 22 | 18,311,668 | <i>COMT</i>          | Intron          | -1    | -1                | G | A | 0.43     | 0.614 |
| rs174675   | 22 | 18,314,051 | <i>COMT</i>          | Intron          | -1    | -1                | C | T | 0.274    | 1     |
| rs5993883  | 22 | 18,317,638 | <i>COMT</i>          | Intron          | -1    | -1                | G | T | 0.479    | 0.723 |
| rs5992500  | 22 | 18,321,947 | <i>COMT</i>          | Intron          | -1    | -1                | C | T | 2.50E-03 | 1     |
| rs7290221  | 22 | 18,322,680 | <i>COMT</i>          | Intron          | -1    | -1                | G | C | 0.491    | 1     |
| rs740603   | 22 | 18,325,177 | <i>COMT</i>          | Intron          | -1    | -1                | G | A | 0.483    | 0.832 |
| rs4646312  | 22 | 18,328,337 | <i>COMT</i>          | Intron          | -1    | -1                | T | C | 0.391    | 0.371 |
| rs165656   | 22 | 18,328,863 | <i>COMT</i>          | Intron          | -1    | -1                | C | G | 0.475    | 0.225 |
| rs4633     | 22 | 18,330,235 | <i>COMT</i>          | Coding          | SYNON | H12H (NP_009294)  | T | C | 0.482    | 0.356 |
| rs2239393  | 22 | 18,330,428 | <i>COMT</i>          | Flanking 3' UTR | -1    | -1                | A | G | 0.396    | 0.46  |
| rs4646316  | 22 | 18,332,132 | <i>COMT</i>          | Intron          | -1    | -1                | C | T | 0.218    | 0.532 |
| rs165774   | 22 | 18,332,561 | <i>COMT</i>          | Intron          | -1    | -1                | G | A | 0.322    | 0.745 |

© 2013 American Medical Association. All rights reserved.

|            |    |             |      |                 |        |                   |   |   |        |          |
|------------|----|-------------|------|-----------------|--------|-------------------|---|---|--------|----------|
| rs174696   | 22 | 18,333,176  | COMT | Intron          | -1     | -1                | T | C | 0.216  | 0.677    |
| rs174697   | 22 | 18,333,832  | COMT | Intron          | -1     | -1                | G | A | 0.0521 | 0.467    |
| rs174699   | 22 | 18,334,458  | COMT | Intron          | -1     | -1                | T | C | 0.0514 | 0.458    |
| rs165599   | 22 | 18,336,781  | COMT | Flanking 3' UTR | -1     | -1                | A | G | 0.325  | 0.375    |
| rs165824   | 22 | 18,339,366  | COMT | Intron          | -1     | -1                | A | G | 0.0818 | 0.0846   |
| rs165815   | 22 | 18,339,473  | COMT | Coding          | NONSYN | Q906R (NP_001661) | T | C | 0.144  | 0.474    |
| rs5993891  | 22 | 18,339,746  | COMT | Intron          | -1     | -1                | C | T | 0.0569 | 0.506    |
| rs2240713  | 22 | 18,341,101  | COMT | Intron          | -1     | -1                | C | T | 0.0524 | 0.161    |
| rs887199   | 22 | 18,341,955  | COMT | Intron          | -1     | -1                | G | A | 0.145  | 0.32     |
| rs887200   | 22 | 18,343,666  | COMT | Intron          | -1     | -1                | T | C | 0.129  | 1        |
| rs10934253 | 3  | 115,320,474 | DRD3 | Flanking 3' UTR | -1     | -1                | A | T | 0.0219 | 0.0509   |
| rs1385884  | 3  | 115,324,315 | DRD3 | Flanking 3' UTR | -1     | -1                | T | A | 0.428  | 0.563    |
| rs2087017  | 3  | 115,324,703 | DRD3 | Flanking 3' UTR | -1     | -1                | A | G | 0.429  | 0.613    |
| rs2399496  | 3  | 115,328,703 | DRD3 | Flanking 3' UTR | -1     | -1                | A | T | 0.474  | 0.67     |
| rs2134655  | 3  | 115,340,891 | DRD3 | Flanking 3' UTR | -1     | -1                | C | T | 0.273  | 0.326    |
| rs963468   | 3  | 115,345,577 | DRD3 | Flanking 3' UTR | -1     | -1                | G | A | 0.388  | 0.551    |
| rs324035   | 3  | 115,351,544 | DRD3 | Intron          | -1     | -1                | C | A | 0.197  | 0.372    |
| rs3773679  | 3  | 115,352,025 | DRD3 | Intron          | -1     | -1                | C | T | 0.386  | 0.823    |
| rs3773678  | 3  | 115,352,768 | DRD3 | Intron          | -1     | -1                | G | A | 0.143  | 0.02     |
| rs2630349  | 3  | 115,356,062 | DRD3 | Intron          | -1     | -1                | G | A | 0.0634 | 2.70E-03 |
| rs2630350  | 3  | 115,357,686 | DRD3 | Intron          | -1     | -1                | C | T | 0.0633 | 2.70E-03 |
| rs167771   | 3  | 115,358,965 | DRD3 | Intron          | -1     | -1                | A | G | 0.176  | 0.463    |
| rs324032   | 3  | 115,360,518 | DRD3 | Intron          | -1     | -1                | A | G | 0.0639 | 3.10E-03 |
| rs167770   | 3  | 115,362,252 | DRD3 | Intron          | -1     | -1                | A | G | 0.281  | 0.38     |
| rs7625282  | 3  | 115,364,217 | DRD3 | Intron          | -1     | -1                | A | G | 0.259  | 0.52     |
| rs324029   | 3  | 115,364,313 | DRD3 | Intron          | -1     | -1                | G | A | 0.282  | 0.432    |
| rs7633291  | 3  | 115,369,758 | DRD3 | Intron          | -1     | -1                | T | G | 0.205  | 0.233    |
| rs324022   | 3  | 115,369,988 | DRD3 | Intron          | -1     | -1                | G | A | 0.282  | 0.337    |
| rs1486009  | 3  | 115,371,222 | DRD3 | Intron          | -1     | -1                | A | G | 0.0545 | 1        |
| rs6280     | 3  | 115,373,505 | DRD3 | Coding          | NONSYN | S9G (NP_387509)   | T | C | 0.335  | 1        |
| rs324026   | 3  | 115,373,732 | DRD3 | Flanking 5' UTR | -1     | -1                | T | C | 0.33   | 0.873    |
| rs7638876  | 3  | 115,376,990 | DRD3 | Flanking 3' UTR | -1     | -1                | T | C | 0.339  | 0.812    |
| rs9825563  | 3  | 115,382,910 | DRD3 | Flanking 5' UTR | -1     | -1                | A | G | 0.315  | 0.25     |
| rs12639080 | 3  | 115,386,481 | DRD3 | Flanking 5' UTR | -1     | -1                | G | A | 0.344  | 0.695    |
| rs7655090  | 4  | 9,374,973   | DRD5 | Flanking 5' UTR | -1     | -1                | A | G | 0.318  | 0.935    |
| rs10939514 | 4  | 9,382,294   | DRD5 | Flanking 5' UTR | -1     | -1                | T | C | 0.0476 | 0.25     |
| rs10939515 | 4  | 9,382,394   | DRD5 | Flanking 5' UTR | -1     | -1                | G | A | 0.17   | 0.21     |
| rs10033951 | 4  | 9,388,678   | DRD5 | Flanking 5' UTR | -1     | -1                | C | T | 0.31   | 1        |
| rs2867383  | 4  | 9,397,033   | DRD5 | Flanking 3' UTR | -1     | -1                | G | A | 0.319  | 0.626    |
| rs1850744  | 4  | 9,399,810   | DRD5 | Flanking 3' UTR | -1     | -1                | C | T | 0.0475 | 0.251    |
| rs13106539 | 4  | 9,406,801   | DRD5 | Flanking 3' UTR | -1     | -1                | T | C | 0.38   | 0.259    |
| rs1519097  | 4  | 9,411,951   | DRD5 | Flanking 3' UTR | -1     | -1                | A | G | 0.33   | 0.199    |
| rs11954565 | 5  | 174,782,513 | DRD1 | Flanking 3' UTR | -1     | -1                | A | G | 0.348  | 0.433    |

© 2013 American Medical Association. All rights reserved.

|            |   |             |               |                 |        |                   |   |   |        |          |
|------------|---|-------------|---------------|-----------------|--------|-------------------|---|---|--------|----------|
| rs1587176  | 5 | 174,783,796 | <i>DRD1</i>   | Flanking 3' UTR | -1     | -1                | T | G | 0.172  | 0.531    |
| rs1310277  | 5 | 174,786,176 | <i>DRD1</i>   | Flanking 3' UTR | -1     | -1                | G | A | 0.128  | 1        |
| rs11739696 | 5 | 174,789,227 | <i>DRD1</i>   | Flanking 3' UTR | -1     | -1                | G | A | 0.37   | 0.363    |
| rs2453737  | 5 | 174,791,508 | <i>DRD1</i>   | Flanking 3' UTR | -1     | -1                | T | C | 0.372  | 0.197    |
| rs6881740  | 5 | 174,791,768 | <i>DRD1</i>   | Flanking 3' UTR | -1     | -1                | C | G | 0.355  | 0.245    |
| rs11742274 | 5 | 174,792,103 | <i>DRD1</i>   | Flanking 3' UTR | -1     | -1                | C | G | 0.192  | 0.649    |
| rs265971   | 5 | 174,793,017 | <i>DRD1</i>   | Flanking 3' UTR | -1     | -1                | T | C | 0.284  | 0.0811   |
| rs265972   | 5 | 174,793,122 | <i>DRD1</i>   | Flanking 3' UTR | -1     | -1                | A | G | 0.473  | 0.523    |
| rs265973   | 5 | 174,793,305 | <i>DRD1</i>   | Flanking 3' UTR | -1     | -1                | C | T | 0.451  | 0.1      |
| rs265974   | 5 | 174,793,846 | <i>DRD1</i>   | Flanking 3' UTR | -1     | -1                | A | G | 0.342  | 0.431    |
| rs265975   | 5 | 174,794,801 | <i>DRD1</i>   | Flanking 3' UTR | -1     | -1                | C | T | 0.344  | 0.814    |
| rs265976   | 5 | 174,795,026 | <i>DRD1</i>   | Flanking 3' UTR | -1     | -1                | G | T | 0.189  | 0.73     |
| rs10476156 | 5 | 174,795,276 | <i>DRD1</i>   | Flanking 3' UTR | -1     | -1                | A | G | 0.151  | 0.783    |
| rs265977   | 5 | 174,795,863 | <i>DRD1</i>   | Flanking 3' UTR | -1     | -1                | C | T | 0.172  | 0.71     |
| rs863126   | 5 | 174,795,954 | <i>DRD1</i>   | Flanking 3' UTR | -1     | -1                | A | T | 0.323  | 0.628    |
| rs835616   | 5 | 174,796,296 | <i>DRD1</i>   | Flanking 3' UTR | -1     | -1                | G | A | 0.365  | 0.125    |
| rs835540   | 5 | 174,796,497 | <i>DRD1</i>   | Flanking 3' UTR | -1     | -1                | T | C | 0.256  | 2.60E-06 |
| rs4867796  | 5 | 174,798,127 | <i>DRD1</i>   | Flanking 3' UTR | -1     | -1                | A | C | 0.17   | 0.45     |
| rs11746641 | 5 | 174,798,697 | <i>DRD1</i>   | Flanking 3' UTR | -1     | -1                | T | G | 0.163  | 0.796    |
| rs11749676 | 5 | 174,798,904 | <i>DRD1</i>   | Flanking 3' UTR | -1     | -1                | G | A | 0.409  | 0.0102   |
| rs5326     | 5 | 174,802,802 | <i>DRD1</i>   | Intron          | -1     | -1                | C | T | 0.132  | 0.644    |
| rs2168631  | 5 | 174,808,608 | <i>DRD1</i>   | Flanking 5' UTR | -1     | -1                | G | A | 0.175  | 0.712    |
| rs6878159  | 5 | 174,809,007 | <i>DRD1</i>   | Flanking 5' UTR | -1     | -1                | A | T | 0.0113 | 1        |
| rs267417   | 5 | 174,813,120 | <i>DRD1</i>   | Flanking 5' UTR | -1     | -1                | G | T | 0.4    | 0.039    |
| rs2471005  | 5 | 174,814,813 | <i>DRD1</i>   | Flanking 5' UTR | -1     | -1                | G | A | 0.4    | 0.0649   |
| rs267400   | 5 | 174,815,305 | <i>DRD1</i>   | Flanking 5' UTR | -1     | -1                | C | T | 0.418  | 1        |
| rs11749035 | 5 | 174,815,658 | <i>DRD1</i>   | Flanking 5' UTR | -1     | -1                | C | T | 0.16   | 0.511    |
| rs267405   | 5 | 174,817,158 | <i>DRD1</i>   | Flanking 5' UTR | -1     | -1                | G | T | 0.418  | 1        |
| rs267406   | 5 | 174,817,347 | <i>DRD1</i>   | Flanking 5' UTR | -1     | -1                | G | T | 0.418  | 1        |
| rs10042051 | 5 | 174,819,467 | <i>DRD1</i>   | Flanking 5' UTR | -1     | -1                | A | G | 0.0132 | 1        |
| rs4733065  | 8 | 27,363,921  | <i>CHRNA2</i> | Intron          | -1     | -1                | G | A | 0.461  | 0.283    |
| rs2278319  | 8 | 27,364,878  | <i>CHRNA2</i> | Intron          | -1     | -1                | C | T | 0.247  | 0.254    |
| rs1106359  | 8 | 27,365,256  | <i>CHRNA2</i> | Intron          | -1     | -1                | T | C | 0.41   | 0.242    |
| rs1879184  | 8 | 27,367,620  | <i>CHRNA2</i> | Coding          | SYNON  | T876T (NP_775268) | C | T | 0.133  | 0.76     |
| rs10093964 | 8 | 27,367,957  | <i>CHRNA2</i> | Intron          | -1     | -1                | C | T | 0.419  | 0.19     |
| rs1879182  | 8 | 27,371,793  | <i>CHRNA2</i> | Coding          | SYNON  | A960A (NP_775268) | G | A | 0.133  | 0.76     |
| rs748283   | 8 | 27,373,112  | <i>CHRNA2</i> | Flanking 3' UTR | -1     | -1                | C | A | 0.491  | 0.138    |
| rs1057137  | 8 | 27,373,362  | <i>CHRNA2</i> | Flanking 3' UTR | -1     | -1                | G | T | 0.395  | 0.413    |
| rs735421   | 8 | 27,375,209  | <i>CHRNA2</i> | Intron          | -1     | -1                | A | G | 0.304  | 0.867    |
| rs891394   | 8 | 27,375,686  | <i>CHRNA2</i> | Intron          | -1     | -1                | C | G | 0.263  | 0.201    |
| rs3735757  | 8 | 27,377,514  | <i>CHRNA2</i> | Intron          | -1     | -1                | C | G | 0.133  | 1        |
| rs2322581  | 8 | 27,379,524  | <i>CHRNA2</i> | Intron          | -1     | -1                | T | G | 0.162  | 1        |
| rs891398   | 8 | 27,380,739  | <i>CHRNA2</i> | Coding          | NONSYN | T125A (NP_000733) | T | C | 0.474  | 0.887    |

© 2013 American Medical Association. All rights reserved.

|            |   |            |                      |                 |        |                  |   |   |        |       |
|------------|---|------------|----------------------|-----------------|--------|------------------|---|---|--------|-------|
| rs891399   | 8 | 27,381,340 | <i>CHRNA2</i>        | Intron          | -1     | -1               | G | A | 0.129  | 0.532 |
| rs2565062  | 8 | 27,381,857 | <i>CHRNA2</i>        | Intron          | -1     | -1               | G | A | 0.129  | 0.635 |
| rs2472554  | 8 | 27,384,271 | <i>CHRNA2</i>        | Intron          | -1     | -1               | C | G | 0.306  | 0.244 |
| rs2472553  | 8 | 27,384,428 | <i>CHRNA2</i>        | Coding          | NONSYN | T22I (NP_000733) | G | A | 0.128  | 0.634 |
| rs7815010  | 8 | 27,386,013 | <i>CHRNA2</i>        | Intron          | -1     | -1               | C | T | 0.249  | 0.925 |
| rs2741339  | 8 | 27,390,886 | <i>CHRNA2</i>        | Intron          | -1     | -1               | A | G | 0.268  | 0.719 |
| rs2565059  | 8 | 27,392,895 | <i>CHRNA2</i>        | Flanking 5' UTR | -1     | -1               | G | A | 0.184  | 0.813 |
| rs2565055  | 8 | 27,393,297 | <i>CHRNA2</i>        | Flanking 5' UTR | -1     | -1               | G | T | 0.241  | 0.771 |
| rs2741335  | 8 | 27,393,708 | <i>CHRNA2</i>        | Flanking 5' UTR | -1     | -1               | A | C | 0.264  | 0.928 |
| rs6558000  | 8 | 27,395,271 | <i>CHRNA2</i>        | Flanking 5' UTR | -1     | -1               | T | C | 0.0746 | 0.612 |
| rs7017417  | 8 | 27,401,222 | <i>CHRNA2</i>        | Flanking 5' UTR | -1     | -1               | A | G | 0.101  | 0.435 |
| rs9314348  | 8 | 27,401,343 | <i>CHRNA2</i>        | Flanking 5' UTR | -1     | -1               | T | C | 0.102  | 0.44  |
| rs7003694  | 8 | 27,403,111 | <i>CHRNA2</i>        | Flanking 5' UTR | -1     | -1               | T | C | 0.0921 | 0.529 |
| rs7017612  | 8 | 42,718,402 | <i>CHRNA6;CHRNA3</i> | Flanking 3' UTR | -1     | -1               | A | C | 0.197  | 0.655 |
| rs9298628  | 8 | 42,725,148 | <i>CHRNA6</i>        | Flanking 3' UTR | -1     | -1               | C | T | 0.195  | 0.822 |
| rs2304297  | 8 | 42,727,356 | <i>CHRNA6</i>        | 3' UTR          | -1     | -1               | G | C | 0.229  | 1     |
| rs2196128  | 8 | 42,737,443 | <i>CHRNA6</i>        | Intron          | -1     | -1               | T | C | 0.216  | 1     |
| rs16891620 | 8 | 42,744,820 | <i>CHRNA6</i>        | Flanking 5' UTR | -1     | -1               | C | A | 0.112  | 0.859 |
| rs10107450 | 8 | 42,749,052 | <i>CHRNA6</i>        | Flanking 5' UTR | -1     | -1               | C | T | 0.222  | 0.918 |
| rs6474419  | 8 | 42,754,456 | <i>CHRNA6</i>        | Flanking 5' UTR | -1     | -1               | A | G | 0.0357 | 0.619 |

Abbreviations: HWE, Hardy-Weinberg equilibrium; MAF, minor allele frequency; SNP, single-nucleotide polymorphism; UTR, untranslated region.
